# Supplementary material
Source: PubMed Central journal article supplement (PMC8373476)
Supplement: EMS112233-supplement-Supplementary_Material.pdf [file EMS112233-supplement-Supplementary_Material.pdf]

## Supplemental Information

### Supplemental Materials and Methods

#### Methods S1. Description of clinical cases carrying pathogenic *HTT* repeat expansions. Related to Table 2.

##### Patient #1

The patient developed asymmetric, transiently levodopa-responsive tremor at age 68, followed by the development of progressive postural and oculomotor problems within three years from symptom onset. He fulfilled the MDS clinical criteria for probable PSP. MRI showed atrophy of the mesencephalon (Colibri sign) and reduced dopamine transporter uptake on SPECT. The clinical course was very slowly progressive. Examination twelve years after symptom onset revealed mild dementia, characterized by psychomotor slowing, reduced verbal fluency, attention, and episodic memory, with a mini-mental status examination of 24/30. There was no family history of neurological disease. The patient passed away at age 83. An autopsy was not performed.

##### Patient #2

The patient developed behavioral changes at the age of 56, and she was diagnosed with behavioral variant FTD. By report, her elderly mother had been diagnosed with Alzheimer's disease.

##### Patient #3

The patient was a woman who developed language disturbances at the age of 57. She was subsequently diagnosed as having nonfluent primary progressive aphasia FTD subtype. There was no family history of neurological disease.

##### Patient #4

The patient was a 19-year-old woman who had presented with a two-year history of progressive academic performance decline, dysarthria, bradykinesia, and gait disturbance. Her speech had become progressively slurred and soft, and her handwriting had deteriorated. She did not report any falls, but she did have several episodes of syncope that were initially diagnosed as seizures. Cranial nerve examination revealed supranuclear vertical gaze palsy, masked facies, and dysarthria. She also had bradykinesia with cogwheeling in her upper limbs, and spasticity and hyperreflexia in the lower limbs. Brain MRI showed basal ganglia iron deposition. She was

started on carbidopa/levodopa but did not improve. An initial genetic screen of *HTT* was reported as normal. The patient's father was said to have a similar neurological syndrome consisting of cognitive decline, gait disorder, and dysarthria that started in his late twenties. The genetic screening was repeated at a later stage in her illness to investigate early-onset, familial dementia. This testing correctly identified an expanded *HTT* repeat allele, and her diagnosis was updated to young-onset Huntington's disease (Westphal syndrome).

#### **Patient #5**

The patient developed symptoms of ALS at the age of 56 and died eleven years later of respiratory failure after a typical course of motor neuron disease. An MRI of the brain performed approximately ten years prior to death did not show significant cerebral or striatal atrophy.

#### **Patient #6**

The patient presented at the age of 44 with personality changes (short temper) and decreased initiative (apathy). His memory was intact, and neuropsychological evaluation was consistent with FTD. His father had speech loss and gait disturbance at the age of 40 and died from his illness at the age of 52.

#### **Patient #7**

This right-handed man presented with lower limb weakness at the age of 76. His sibling had been diagnosed with ALS. Neurological examination at the age of 84 revealed an ALS Functional Rating Scale of 17 (maximum score of the ALSFRS-R = 40). He had upper and lower motor neuron signs in the bulbar region, the upper limbs, and the lower limbs. Additionally, he was diagnosed with FTD. He was placed on non-invasive positive pressure ventilation for respiratory failure.

#### **Patient #8**

This patient was a man who developed a right foot drop at the age of 62. He was initially diagnosed with primary lateral sclerosis and had a baclofen pump implanted for treating spasticity. His symptoms progressed, and the diagnosis was changed to ALS based on neurophysiological testing. Before death, he was unable to ambulate, used a motorized wheelchair, had limited hand movements, wore a cervical collar to correct head tilt, and used an eye gaze system to communicate. He died at the age of 70 due to respiratory failure.

## Supplemental Figures

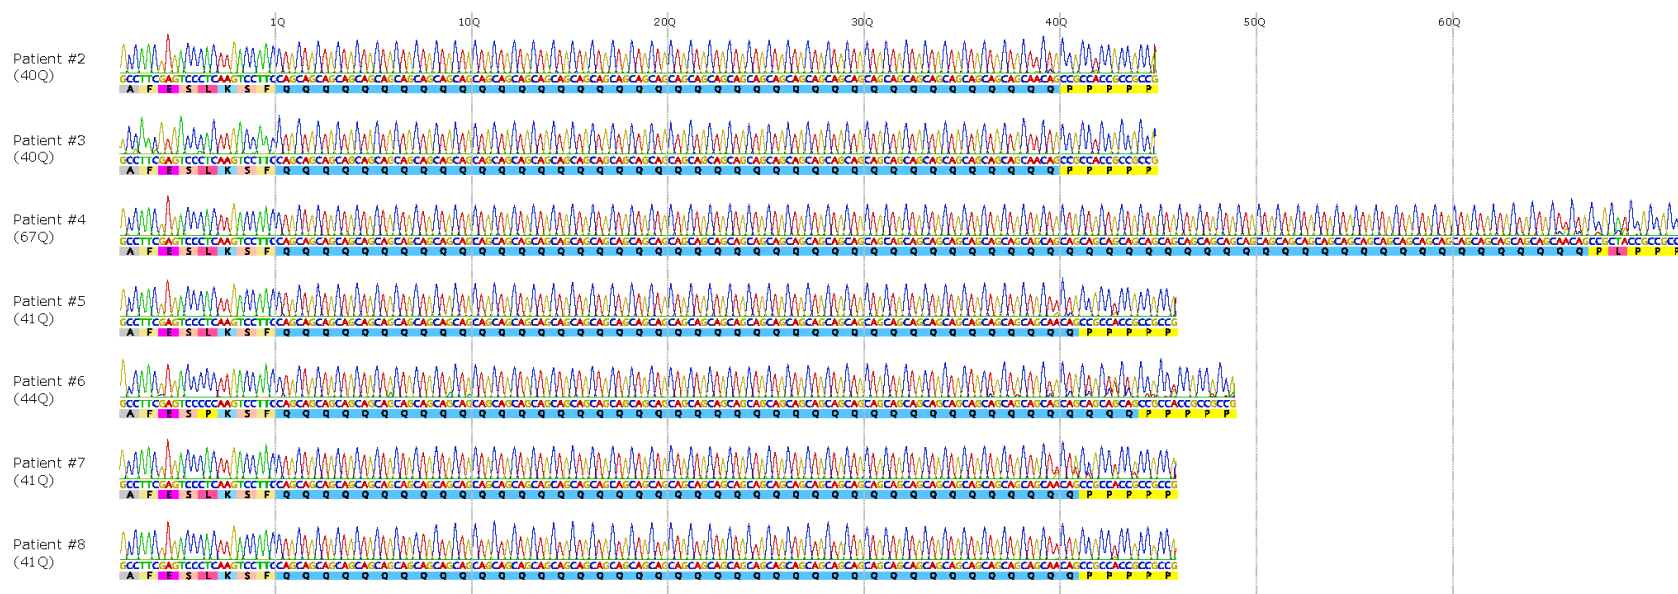

**Figure S1. Sanger sequencing chromatograms of the *HTT* CAG repeat expansion. Related to Figure 1.**

*HTT* CAG repeat length was assessed by cloning followed by Sanger sequencing for seven of the eight FTD/ALS patients carrying full-penetrance pathogenic repeat expansions ( $\geq 40$  CAG repeats). DNA was not available for the eighth patient (Patient #1).

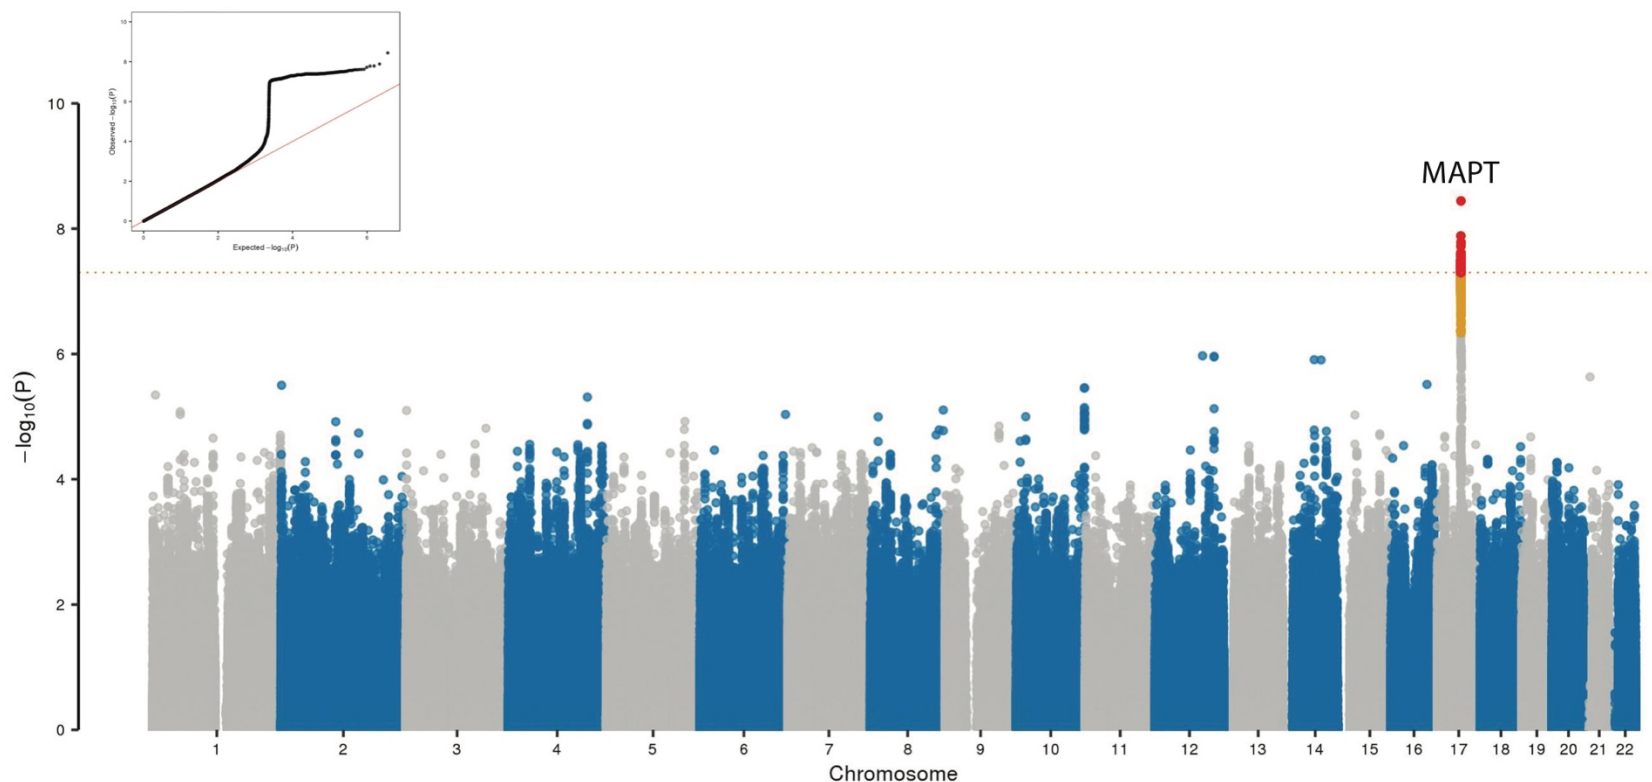

**Figure S2. Genome-wide association study of the FTD/ALS discovery cohort. Related to Figure 1.**

Manhattan plot depicting GWAS results (MAF >5%) based on 2,451 cases and 4,029 controls that passed filtering metrics for the FTD/ALS patient cohort. Chromosomal positions (build hg38) are depicted on the x-axis, and association  $p$ -values are indicated on the y-axis using a  $-\log_{10}$  scale. Genome-wide significant signals are shown by red dots, and orange dots indicate suggestive variants. The name The horizontal dashed line indicates the Bonferroni threshold for genome-wide significance. The gene with the closest proximity to the top variant at the significant locus on chromosome 17 is shown. The insert figure shows the quartile-quartile plot ( $\lambda = 1.016$ ,  $\lambda_{1000} = 1.005$ ).

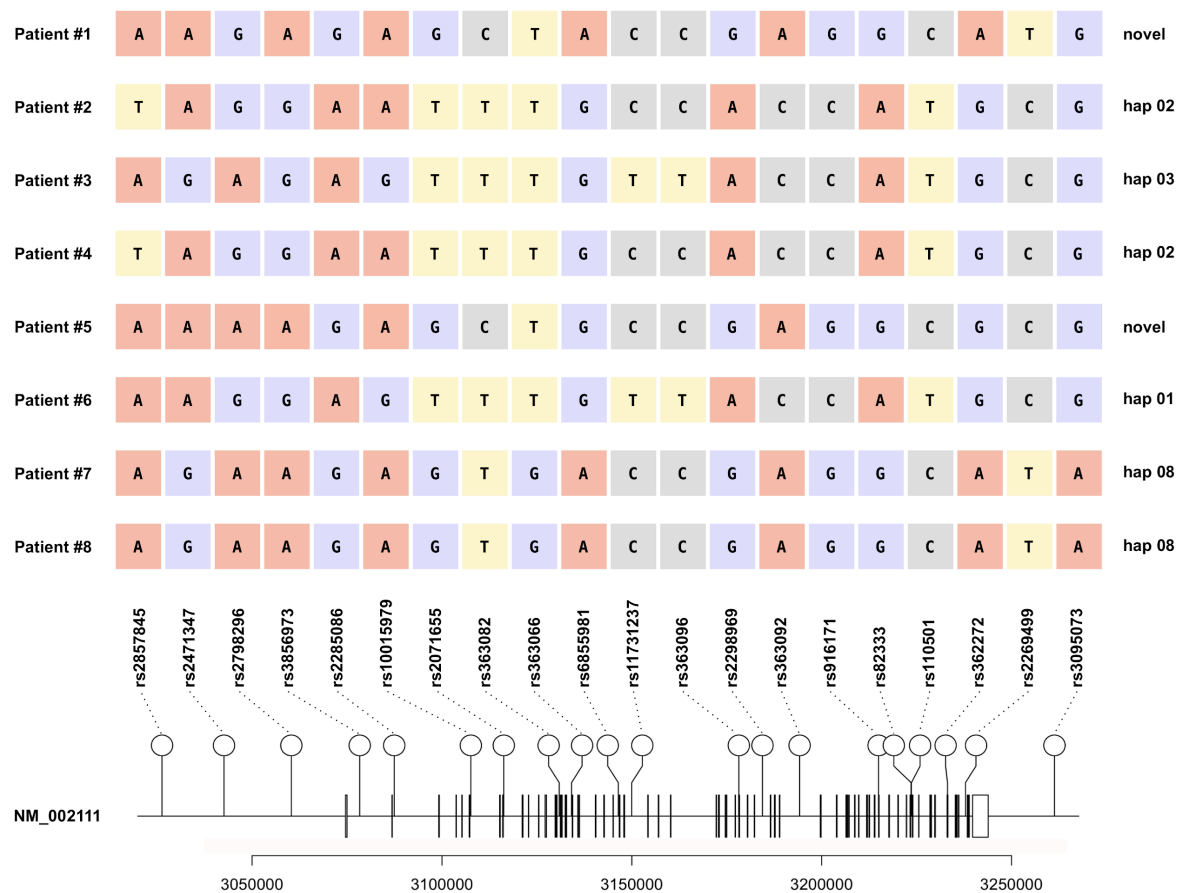

**Figure S3. The occurrence of known haplotypes across the *HTT* locus. Related to Figure 1.**

Haplotypes across the *HTT* locus are shown for the eight FTD/ALS patients carrying full penetrance repeat expansions. Numbered haplotypes correspond to known haplotypes associated with Huntington’s disease, as defined by Chao and colleagues (Chao et al., 2017). Haplotypes not previously associated with Huntington’s disease are marked as “novel.” Individual SNPs used to define the haplotypes are shown below, along with their locations along the *HTT* gene (NM\_002111).

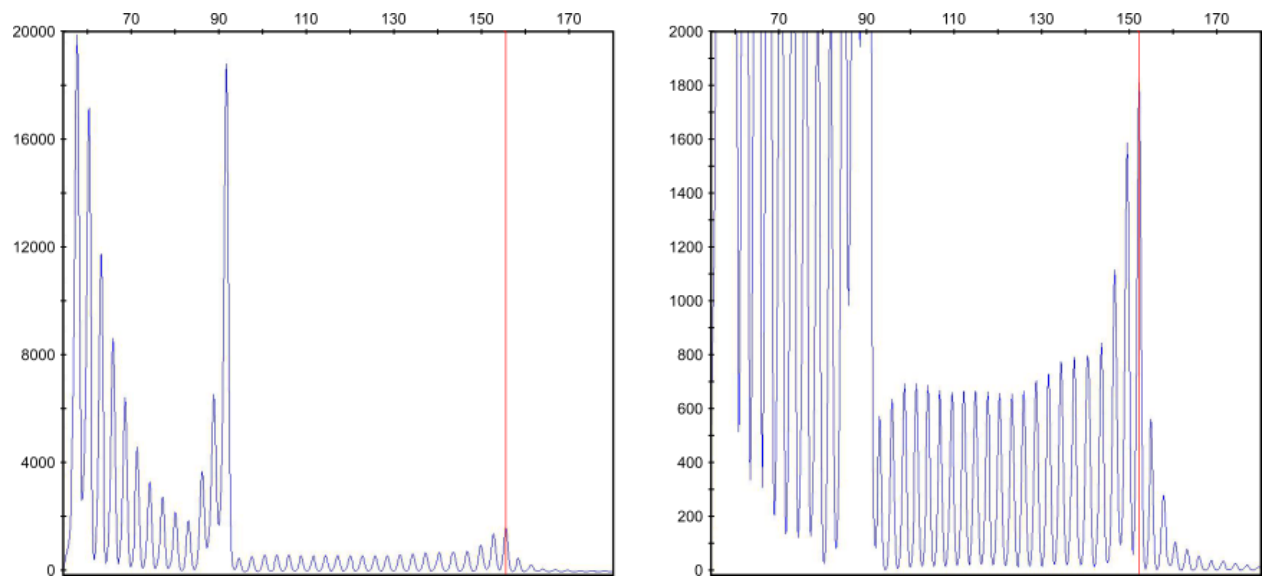

**Figure S4. A representative chromatogram from the repeat-primed PCR assay used to quantify somatic mosaicism of the *HTT* CAG repeat expansion. Related to Figure 2.**

The left panel shows the maximum view chromatogram, and the right panel shows a magnified view of the expanded allele. The red line indicates the modal peak, and expansion peaks can be visualized to the right of this peak.

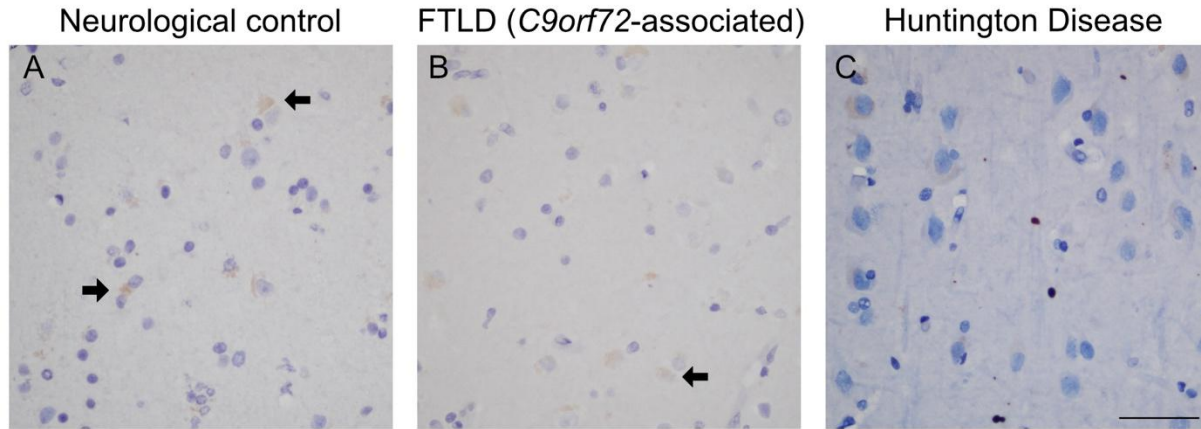

**Figure S5. Photomicrographs of layer V of the prefrontal cortex (BA9) immunostained against huntingtin. Related to Figure 3.**

(A-B) A 91-year-old woman without antemortem neurological impairment and a 71-year-old man with *C9orf72* FTD. Weak, diffuse, cytoplasmic staining of huntingtin was seen within the neurons (indicated by arrows) in these two brains, and no huntingtin aggregates were found. (C) A 75-year-old woman with Huntington's disease (CAG: 42/15) demonstrating extra-nuclear Huntingtin aggregates and faint cytoplasmic staining in a subset of neurons. Scale bar: 50  $\mu$ m

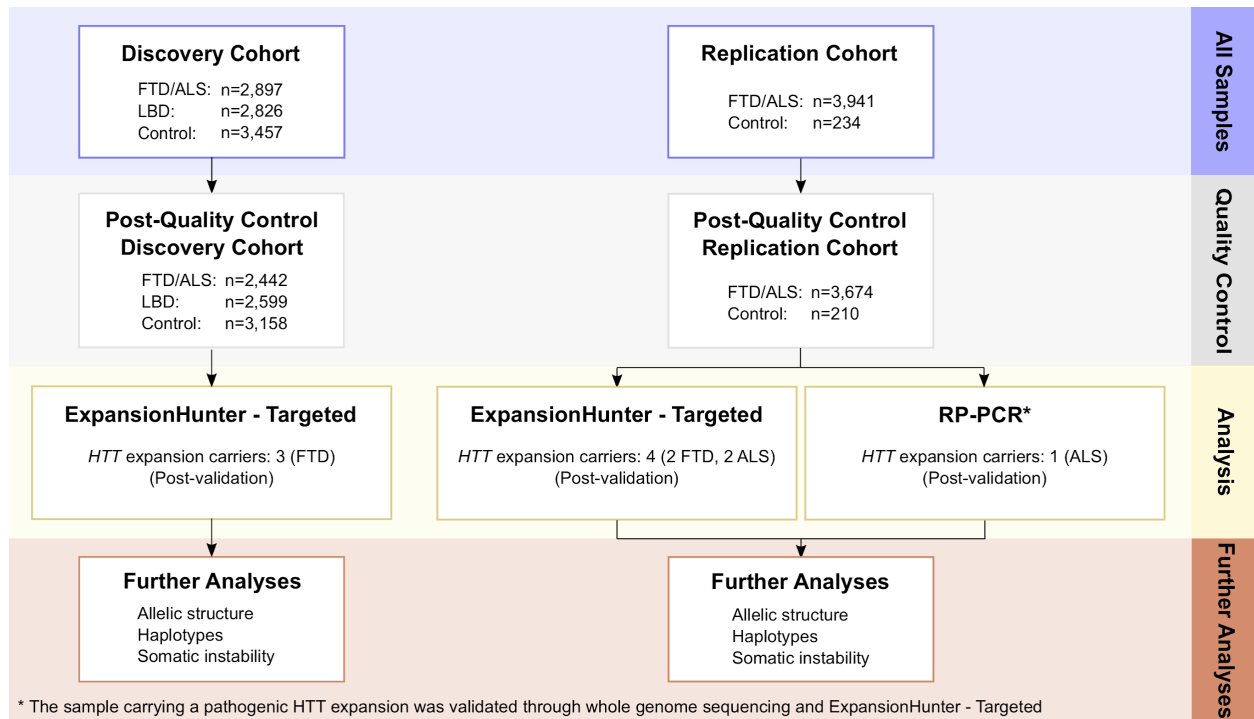

**Figure S6. Flow chart outlining the study. Related to Figure 1.**



## Supplementary Tables

**Table S1. Results of ExpansionHunter – Targeted applied to whole-genome sequence data for ten disease-causing repeat expansions. Related to STAR Methods.**

| Gene             | Chr      | Inheritance* | Lower Bound | Control Pathogenic / Total | Control Pathogenic Freq | FTD Pathogenic / Total | FTD Pathogenic Freq | ALS Pathogenic / Total | ALS Pathogenic Freq | LBD Pathogenic / Total | LBD Pathogenic Freq |
|------------------|----------|--------------|-------------|----------------------------|-------------------------|------------------------|---------------------|------------------------|---------------------|------------------------|---------------------|
| AR               | X        | XL           | 37          | 10/3157                    | 0.003168                | 3/1377                 | 0.002179            | 3/1065                 | 0.002817            | 6/2599                 | 0.002309            |
| AR Female        | X        | XL           | 37          | 2/1665                     | 0.001201                | 1/634                  | 0.001577            | 1/490                  | 0.002041            | 2/903                  | 0.002215            |
| AR Male          | X        | XL           | 37          | 8/1454                     | 0.005502                | 2/743                  | 0.002692            | 2/575                  | 0.003478            | 4/1603                 | 0.002495            |
| ATN1             | 12       | AD           | 48          | 0/3158                     | 0                       | 0/1377                 | 0                   | 0/1065                 | 0                   | 0/2598                 | 0                   |
| ATXN1            | 6        | AD           | 39          | 14/3158                    | 0.004433                | 6/1377                 | 0.004357            | 4/1065                 | 0.003756            | 16/2599                | 0.006156            |
| ATXN3            | 14       | AD           | 52          | 0/3158                     | 0                       | 0/1377                 | 0                   | 0/1065                 | 0                   | 0/2599                 | 0                   |
| C9orf72          | 9        | AD           | 30          | 5/3158                     | 0.001583                | 59/1377                | 0.042847            | 108/1065               | 0.101408            | 6/2599                 | 0.002309            |
| DMPK             | 19       | AD           | 50          | 4/3158                     | 0.001267                | 2/1377                 | 0.001452            | 1/1065                 | 0.000939            | 2/2599                 | 0.00077             |
| FMR1             | X        | XL           | 200         | 0/3158                     | 0                       | 0/1377                 | 0                   | 0/1065                 | 0                   | 0/2599                 | 0                   |
| FMR1 Female      | X        | XL           | 200         | 0/1665                     | 0                       | 0/634                  | 0                   | 0/490                  | 0                   | 0/903                  | 0                   |
| FMR1 Male        | X        | XL           | 200         | 0/1455                     | 0                       | 0/743                  | 0                   | 0/575                  | 0                   | 0/1603                 | 0                   |
| FXN (hom)        | 9        | AR           | 66          | 0/3158                     | 0                       | 0/1377                 | 0                   | 0/1065                 | 0                   | 0/2599                 | 0                   |
| <b>HTT (CAG)</b> | <b>4</b> | <b>AD</b>    | <b>40</b>   | <b>0/3158</b>              | <b>0</b>                | <b>3/1377</b>          | <b>0.002179</b>     | <b>0/1065</b>          | <b>0</b>            | <b>0/2599</b>          | <b>0</b>            |
| PHOX2B           | 4        | AD           | 25          | 776/3158                   | 0.245725                | 296/1377               | 0.21496             | 251/1065               | 0.235681            | 542/2599               | 0.208542            |

\* Modes of inheritance: x-linked (XL), autosomal dominant (AD), autosomal recessive (AR); homozygous (hom) refers to biallelic expansion in genes with autosomal recessive. All ten disease-causing repeat expansions have been previously experimentally validated (Dolzhenko et al.; 2017, Dolzhenko et al., 2019).

**Table S2. Demographic and clinical features of samples included in the analysis. Related to Table 1.**

|                        | <b>FTD<br/>(n = 1,476)</b> | <b>ALS<br/>(n = 1,065)</b> | <b>LBD<br/>(n = 2,599)</b> | <b>Control<br/>(n = 3,158)</b> |
|------------------------|----------------------------|----------------------------|----------------------------|--------------------------------|
| Female (%)             | 678 (46.0%)                | 490 (46.0%)                | 1,649 (63.4%)              | 1,483 (47.0%)                  |
| Age (IQR)              | 65.2 (58.0–71.0)           | 65.6 (59.0–73.0)           | 74.7 (68.0–82.0)           | 77.0 (69.0–86.0)               |
| Site of onset          |                            |                            |                            |                                |
| Cognitive (%)          | 1,476 (100%)               | 2 (0.2%)                   | 2,599 (100.0%)             | -                              |
| Bulbar (%)             | -                          | 322 (30.2%)                | -                          | -                              |
| Spinal (%)             | -                          | 603 (56.6%)                | -                          | -                              |
| Family history (%)     | 67 (4.5%)                  | 111 (10.4%)                | 240 (9.2%)                 | -                              |
| <i>C9orf72</i> carrier | 50 (3.4%)                  | 104 (9.8%)                 | -                          | -                              |

FTD, frontotemporal dementia; ALS, amyotrophic lateral sclerosis; LBD, Lewy body dementia; IQR, interquartile range; *C9orf72* carrier status is based on repeat-primed PCR and ExpansionHunter – Targeted; Site of onset is missing for 138 ALS cases. *C9orf72* status is missing for 6 ALS and 22 FTD cases. The contributing study sites and consortia for these samples were: Pitie-Salpetriere Hospital (Paris), University of Thessalia (Volos), Dublin Brain Bank (Dublin), University of Torino (Torino), University Hospital of Cagliari (Cagliari), University of Bari (Bari), University of Luxembourg (Luxembourg City), Hospital de Sant Pau (Barcelona), University Hospital Mutua de Terrassa (Barcelona), Biobanc-Hospital Clinic - IDIBAPS (Barcelona), Hospital Universitario "Marques de Valdecilla" (Santander), King's College London (London), University College London (London), Imperial College London (London), University of Bristol Brain Bank (Bristol), Newcastle University (Newcastle upon Tyne), The University of Manchester (Manchester), McGill University (Montreal), University of Toronto (Toronto), Virginia Commonwealth University (Richmond, VA), Banner Sun Health Research Institute (Phoenix, AZ), Rush Alzheimer's Disease Center (Chicago, IL), Northwestern University (Evanston, IL), Parkinson's Disease Biomarker Program, Fox Investigation for New Discovery of Biomarkers Program, Indiana University School of Medicine (Indianapolis, IN), National Institutes of Health (Bethesda, MD), New York University Langone Medical Center (New York, NY), Icahn School of Medicine at Mount Sinai (New York, NY), National Cell Repository for Alzheimer's Disease (Indianapolis, IN), University of California San Diego (San Diego, CA), University of California (Irvine, CA), North American Brain Expression Consortium, NINDS Biorepository at Coriell Institute (Camden, NJ), University of Maryland Brain Bank (Baltimore, MD), University of Kansas Medical Center (Kansas City, KS), University of Michigan Brain Bank (Ann Arbor, MI), Mayo Clinic (Jacksonville, FL), Mayo Clinic (Rochester, MN), Brigham & Women's Hospital (Boston, MA), Scripps Translational Science Institute (La Jolla, CA), Johns Hopkins University (Baltimore, MD), Oregon Health & Science University Brain Bank (Portland, OR), and Baltimore Longitudinal Study on Aging (Baltimore, MD).

**Table S3. Primer sequences and conditions used for the repeat-primed PCR and for cloning and Sanger sequencing. Related to STAR Methods.**

| <b>Primers</b> | <b>Sequence</b>                 |
|----------------|---------------------------------|
| Forward_RPPCR  | 6FAM-ATGAAGGCCTTCGAGTCCCTCAAGTC |
| Reverse_RPPCR  | ATGAAGGCCTTCGAGTCCCTCAAGTC      |
| HD1F           | CCGCTCAGGTTCTGCTTTTA            |
| HD1FR          | GGCTGAGGCAGCAGCGGCTG            |

Thermocycling conditions for the repeat-primed PCR (RPPCR) were as per Jama et al., 2013. HD1F and HD1FR refer to the forward and reverse primers respectively used for PCR amplification prior to cloning. Thermocycling conditions for the Sanger sequencing were as follows: 95°C for 5 minutes, then (94°C for 20 seconds, 70°C for 30 seconds, 72°C for 30 seconds) x 2 cycles, (94°C for 20 seconds, 68°C for 30 seconds, 72°C for 30 seconds) x 3 cycles, (94°C for 20 seconds, 66°C for 30 seconds, 72°C for 30 seconds) x 4 cycles, (94°C for 20 seconds, 64°C for 30 seconds, 72°C for 30 seconds) x 5 cycles, (94°C for 20 seconds, 62°C for 30 seconds, 72°C for 30 seconds) x 6 cycles, (94°C for 20 seconds, 60°C for 30 seconds, 72°C for 30 seconds) x 8 cycles, (94°C for 20 seconds, 58°C for 30 seconds, 72°C for 30 seconds) x 12 cycles, followed by a final extension stage of 72°C for 10 minutes.

**Table S4. Conditions used for immunohistochemistry staining of brain and spinal cord tissue. Related to STAR Methods.**

| <b>Antibody</b>                                                       | <b>Company</b>     | <b>Catalogue number</b> | <b>Dilution</b> | <b>Primary antibody incubation time (minutes)</b> | <b>Protocol and dilution</b>               | <b>Platform</b>          |
|-----------------------------------------------------------------------|--------------------|-------------------------|-----------------|---------------------------------------------------|--------------------------------------------|--------------------------|
| Huntingtin/p62 double stain                                           | Millipore/Abcam    | MAB5492/ab207305        | 1:2000          | 32/24                                             | 64 min (CC1)                               | Roche Ventana Instrument |
| Huntingtin single stain                                               | Millipore          | MAB5492                 | 1:2000          | 32                                                | 64 min (CC1)                               | Roche Ventana Instrument |
| Rabbit Anti-Ubiquitin                                                 | Dako               | Z0458                   | 1:2000          | 21 hrs                                            | --                                         | Manual                   |
| Anti-polyglutamine-Expansion Diseases Marker Antibody, clone 5TF1-1C2 | Millipore Sigma    | MAB1574                 | 1:500           | 21 hrs                                            | --                                         | Manual                   |
| Anti-phospho TDP-43 (pS409/410)                                       | Cosmo Bio Co., Ltd | CAC-TIP-PTD-M01         | 1:2000          | 21 hrs                                            | pretreat 10min boil citrate buffer, pH 6.0 | Manual                   |
| Anti-TDP-43                                                           | Proteintech        | 10782-2-AP              | 1:2000          | 32                                                | 64 min (CC1)                               | Leica Bond Platform      |

## **Acknowledgments for the Consortia members**

The International Lewy Body Dementia Genomics Consortium is co-directed by Dr. Bryan J. Traynor and Dr. Sonja W. Scholz. The study used samples from the Sant Pau Initiative on Neurodegeneration (Sayagues et al.) cohort (Sant Pau Hospital, Barcelona, Spain). We thank the University of Toronto Brain Bank for providing DNA specimens, and we thank the Canadian Consortium on Neurodegeneration in Aging. We are grateful to the Rush Alzheimer's Disease Center for providing brain tissue and DNA samples, which was supported by the grants P30 AG10161, R01 AG15819, R01 AG17917, U01 AG46152, U01 AG61356. We thank the Dublin Brain Bank, Oregon Health & Science University Brain Bank (with support of the ADC grant 5 P30 AG008017), King's College Brain Bank, Manchester University Brain Bank, the Department of Pathology and Laboratory Medicine, University of Kansas School of Medicine and The Target ALS Multicenter Postmortem Core for contributing tissue specimens. We are grateful to Dr. Bernardino Ghetti from the Department of Pathology and Laboratory Medicine at Indiana University for providing tissue samples. The biospecimens from the University of California, Irvine ADRC used in this project were supported by the NIH/NIA grant P50 AG016573. Samples from the National Centralized Repository for Alzheimer's Diseases and Related Dementias (NCRAD), which receives government support under a cooperative agreement grant (U24 AG021886) awarded by the National Institute on Aging (NIA), were used in this study. The National Alzheimer's Coordinating Center (NACC) database is funded by the NIA/NIH Grant U01 AG016976. NACC data are contributed by the NIA-funded ADCs: P30 AG019610 (PI Eric Reiman, MD), P30 AG013846 (PI Neil Kowall, MD), P50 AG008702 (PI Scott Small, MD), P50 AG025688 (PI Allan Levey, MD, PhD), P50 AG047266 (PI Todd Golde, MD, PhD), P30 AG010133 (PI Andrew Saykin, PsyD), P50 AG005146 (PI Marilyn Albert, PhD), P50 AG005134 (PI Bradley Hyman, MD, PhD), P30 AG062677 (PI Ronald Petersen, MD, PhD), P50 AG005138 (PI Mary Sano, PhD), P30 AG008051 (PI Thomas Wisniewski, MD), P30 AG013854 (PI M. Marsel Mesulam, MD), P30 AG008017 (PI Jeffrey Kaye, MD), P30 AG010161 (PI David Bennett, MD), P50 AG047366 (PI Victor Henderson, MD, MS), P30 AG010129 (PI Charles DeCarli, MD), P50 AG016573 (PI Frank LaFerla, PhD), P50 AG005131 (PI James Brewer, MD, PhD), P50 AG023501 (PI Bruce Miller, MD), P30 AG035982 (PI Russell Swerdlow, MD), P30 AG028383 (PI Linda Van Eldik, PhD), P30 AG053760 (PI Henry Paulson, MD, PhD), P30 AG010124 (PI John Trojanowski, MD, PhD), P50 AG005133 (PI Oscar Lopez, MD), P50 AG005142 (PI Helena Chui, MD), P30 AG012300 (PI Roger Rosenberg, MD), P30 AG049638 (PI Suzanne Craft, PhD), P50 AG005136 (PI Thomas Grabowski, MD), P50 AG033514 (PI Sanjay Asthana, MD, FRCP), P50 AG005681 (PI John Morris, MD), P50 AG047270 (PI Stephen Strittmatter, MD, PhD). We thank the South West Dementia Brain Bank (SWDBB) for providing DNA samples for this study. The SWDBB is part of the Brains for Dementia Research Programme, jointly funded by Alzheimer's Research UK and Alzheimer's Society, and is supported by BRACE (Bristol Research into Alzheimer's and Care of the Elderly) and the Medical Research Council. We are grateful to the Banner Sun Health Research Institute Brain and Body Donation Program of Sun City, Arizona, for the provision of human brain tissue (PI Thomas G. Beach). The Brain and Body Donation Program is supported by the National Institute of Neurological Disorders and Stroke (U24 NS072026 National Brain and Tissue Resource for Parkinson's Disease and Related Disorders), the National Institute on Aging (P30 AG19610 Arizona Alzheimer's Disease Core Center), the Arizona Department of Health Services (contract 211002, Arizona Alzheimer's Research Center), the Arizona Biomedical Research Commission (contracts 4001, 0011, 05-901 and 1001

to the Arizona Parkinson's Disease Consortium) and the Michael J. Fox Foundation for Parkinson's Research. This study was supported by an Alzheimer's Disease Core Center grant (P30 AG013854) from the National Institute on Aging to Northwestern University, Chicago, Illinois. We gratefully acknowledge the assistance of the Neuropathology Core. The Alzheimer's Disease Genetics Consortium supported the collection of samples used in this study through the National Institute on Aging (NIA) grants U01 AG032984 and RC2 AG036528). This study used samples and clinical data from the NINDS Repository at Coriell (<https://catalog.coriell.org>). Samples and data from patients included in this study were provided by the Biobank Valdecilla (PD13/0010/0024), integrated into the Spanish National Biobank Network, and they were processed following standard operating procedures with the appropriate approval of the Ethics and Scientific Committees. We thank the Mayo Clinic Brain Bank for contributing DNA samples and data from patients with Lewy body dementia, which is supported by U54 NS110435 (PI Dennis W Dickson, MD), U01 NS100620 (PI Kejal Kantarci, MD) and The Mangurian Foundation Lewy Body Dementia Program. Sample collection and characterization is also supported by the Mayo Clinic Functional Genomics of LBD Program, NINDS R01 NS78086 (PI Owen Ross), Mayo Clinic Center for Individualized Medicine, and The Little Family Foundation. Mayo Clinic is an American Parkinson Disease Association (APDA) Mayo Clinic Information and Referral Center, an APDA Center for Advanced Research and the Mayo Clinic Lewy Body Dementia Association (LBDA) Research Center of Excellence. We thank the Paris Neuro-CEB Brain Bank (C. Duyckaerts) for contributing DNA samples. We thank the Baltimore Longitudinal Study of Aging for providing DNA samples ([www.blsa.nih.gov](http://www.blsa.nih.gov)). Tissue samples were provided by the Johns Hopkins Morris K. Udall Center of Excellence for Parkinson's Disease Research (NIH P50 N38377) and the Johns Hopkins Alzheimer Disease Research Center (NIH P50 AG05146). This study used tissue samples and data from the Michigan Brain Bank, the Michigan Alzheimer's Disease Center (P30 AG053760), and the Protein Folding Disorders Program. We are indebted to the HCB-IDIBAPS Biobank (Barcelona, Spain) for sample and data procurement. Tissue for this study was provided by the Newcastle Brain Tissue Resource, which is funded by a grant from the UK Medical Research Council (G0400074), by NIHR Newcastle Biomedical Research Centre awarded to the Newcastle upon Tyne NHS Foundation Trust and Newcastle University, and as part of the Brains for Dementia Research Programme jointly funded by Alzheimer's Research UK and Alzheimer's Society. We thank the North American Brain Expression Consortium (NABEC) for providing DNA samples derived from brain tissue. Brain tissue for the NABEC cohort was obtained from the Baltimore Longitudinal Study on Aging at the Johns Hopkins School of Medicine, and from the NICHD Brain and Tissue Bank for Developmental Disorders at the University of Maryland, Baltimore, MD, USA. We thank the United Kingdom Brain Expression Consortium (UKBEC) for providing DNA samples. Tissue samples and associated clinical and neuropathological data were supplied by the Parkinson's UK Brain Bank, funded by Parkinson's UK, a charity registered in England and Wales (258197) and in Scotland (SC037554). The authors would like to thank Parkinson's UK for their continued support and the donors and family for their invaluable donation of brain tissue to the Parkinson's UK Tissue Bank. This work was supported by a grant from the Luxembourg National Research Fund (Fonds National de Recherche, FNR) within the National Centre of Excellence in Research on Parkinson's disease (NCER-PD). This work was supported by the NIA grants U01AG049508 (PI Alison Goate) and U01 AG052411 (PI Alison Goate, DPhil). We thank Estelle Sandt, Integrated Biobank Luxembourg (IBBL), and Lars Geffers, Luxembourg Centre for Systems Biomedicine (LCSB) of the University of Luxembourg, for excellent project

management and the whole NCER-PD Consortium. Finally, we thank all participants of the Luxembourg Parkinson's Study within the NCER-PD. This work was supported by the Italian Ministry of Health (Ministero della Salute, Ricerca Sanitaria Finalizzata, grant RF-2016-02362405), the European Commission's Health Seventh Framework Programme (FP7/2007-2013 under grant agreement 259867), the Italian Ministry of Education, University and Research (Progetti di Ricerca di Rilevante Interesse Nazionale, PRIN, grant 2017SNW5MB), the Joint Programme – Neurodegenerative Disease Research (Strength and Brain-Mend projects), granted the by Italian Ministry of Education, University and Research. This study was performed under the Department of Excellence grant of the Italian Ministry of Education, University and Research to the Rita Levi Montalcini Department of Neuroscience, University of Torino, Italy. Tissue samples were supplied by The London Neurodegenerative Diseases Brain Bank, which receives funding from the MRC (grant MR/L016397/1) and as part of the Brains for Dementia Research programme, jointly funded by Alzheimer's Research UK and Alzheimer's Society. DNA samples were generated by funding from the Alzheimer's Society (422; AS-URB-18-013; PI Angela Hodges). The biospecimens from the Sunnybrook Dementia Study (<https://clinicaltrials.gov/ct2/show/NCT01800214>) used in this project was supported by a grant from the Canadian Institutes of Health Research (MOP13129; PIs Sandra E. Black, Mario Masellis) and an Early Researcher Award from the Ministry of Research, Innovation and Science (MRIS; Ontario; PI Mario Masellis). The Harvard Biomarkers Study (<https://www.bwhparkinsoncenter.org>) is a collaborative initiative of Brigham and Women's Hospital and Massachusetts General Hospital, co-directed by Drs. Clemens Scherzer and Bradley T. Hyman. The HBS Investigators have not participated in reviewing the current manuscript. The HBS Study Investigators are: Harvard Biomarkers Study. Co-Directors: Brigham and Women's Hospital: Clemens R. Scherzer, Massachusetts General Hospital: Bradley T. Hyman; Investigators and Study Coordinators: Brigham and Women's Hospital: Yuliya Kuras, Karbi Choudhury, Michael T. Hayes, Aleksandar Videnovic, Nutan Sharma, Vikram Khurana, Claudio Meleo De Gusmao, Reisa Sperling; Massachusetts General Hospital: John H. Growdon, Michael A. Schwarzschild, Albert Y. Hung, Alice W. Flaherty, Deborah Blacker, Anne-Marie Wills, Steven E. Arnold, Ann L. Hunt, Nichte I. Mejia, Anand Viswanathan, Stephen N. Gomperts, Mark W. Albers, Maria Allora-Palli, David Hsu, Alexandra Kimball, Scott McGinnis, John Becker, Randy Buckner, Thomas Byrne, Maura Copeland, Bradford Dickerson, Matthew Frosch, Theresa Gomez-Isla, Steven Greenberg, Julius Hedden, Elizabeth Hedley-Whyte, Keith Johnson, Raymond Kelleher, Aaron Koenig, Maria Marquis-Sayagues, Gad Marshall, Sergi Martinez-Ramirez, Donald McLaren, Olivia Okereke, Elena Ratti, Christopher William, Koene Van Dij, Shuko Takeda, Anat Stemmer-Rachaminov, Jessica Kloppenburg, Catherine Munro, Rachel Schmid, Sarah Wigman, Sara Wlodarczyk; Data Coordination: Brigham and Women's Hospital: Thomas Yi; Biobank Management Staff: Brigham and Women's Hospital: Idil Tuncali. We thank all study participants and their families for their invaluable contributions. HBS is made possible by generous support from the Harvard NeuroDiscovery Center, with additional contributions from the Michael J Fox Foundation, NINDS U01NS082157, U01NS100603, and the Massachusetts Alzheimer's Disease Research Center NIA P50AG005134. This study acknowledges the National Institute of Neurological Disorders and Stroke (NINDS) supported Parkinson's Disease Biomarkers Program Investigators ([https://pdbp.ninds.nih.gov/sites/default/files/assets/PDBP\\_investigator\\_list.pdf](https://pdbp.ninds.nih.gov/sites/default/files/assets/PDBP_investigator_list.pdf)). A full list of PDBP investigators can be found at <https://pdbp.ninds.nih.gov/policy>. Data and biospecimens used in the preparation of this manuscript were obtained from the Parkinson's Disease

Biomarkers Program (PDBP) Consortium, part of the National Institute of Neurological Disorders and Stroke at the National Institutes of Health. Investigators include: Roger Albin, Roy Alcalay, Alberto Ascherio, Thomas Beach, Sarah Berman, Bradley Boeve, F. DuBois Bowman, Shu Chen, Alice Chen-Plotkin, William Dauer, Ted Dawson, Paula Desplats, Richard Dewey, Ray Dorsey, Jori Fleisher, Kirk Frey, Douglas Galasko, James Galvin, Dwight German, Lawrence Honig, Xuemei Huang, David Irwin, Kejal Kantarci, Anumantha Kanthasamy, Daniel Kaufer, James Leverenz, Carol Lippa, Irene Litvan, Oscar Lopez, Jian Ma, Lara Mangravite, Karen Marder, Laurie Ozelius, Vladislav Petyuk, Judith Potashkin, Liana Rosenthal, Rachel Saunders-Pullman, Clemens Scherzer, Michael Schwarzschild, Tanya Simuni, Andrew Singleton, David Standaert, Debby Tsuang, David Vaillancourt, David Walt, Andrew West, Cyrus Zabetian, Jing Zhang, and Wenquan Zou. The PDBP Investigators have not participated in reviewing the data analysis or content of the manuscript. This research was made possible through access to the data and findings generated by the 100,000 Genomes Project. The 100,000 Genomes Project is managed by Genomics England Limited (a wholly-owned company of the Department of Health and Social Care). The 100,000 Genomes Project is funded by the National Institute for Health Research and NHS England. The Wellcome Trust, Cancer Research UK, and the Medical Research Council have also funded research infrastructure. The 100,000 Genomes Project uses data provided by patients and collected by the National Health Service as part of their care and support. J.E.L. was supported by the National Institute of Health (NIH)/National Institute of Neurological Disorders and Stroke (NINDS) (R01 NS073873) and the American ALS Association National and Massachusetts Chapters. A.T. is a Medical Research Council Clinician Scientist (MR/S006753/1). This work was supported by the UK Dementia Research Institute which receives its funding from DRI Ltd, funded by the UK Medical Research Council, Alzheimer's Society and Alzheimer's Research UK. J.A.H was funded by the Medical Research Council (award number MR/N026004/1), the Wellcome Trust (award number 202903/Z/16/Z), the Dolby Family Fund, and the National Institute for Health Research University College London Hospitals Biomedical Research Centre. RF was funded by the Alzheimer's Society (grant #284). PVD holds a senior clinical investigatorship of FWO-Vlaanderen and is supported by E. von Behring Chair for Neuromuscular and Neurodegenerative Disorders, the ALS Liga België and the KU Leuven funds "Een Hart voor ALS," "Laeversfonds voor ALS Onderzoek" and the "Valéry Perrier Race against ALS Fund." Several authors of this publication are members of the European Reference Network for Rare Neuromuscular Diseases (ERN-NMD). Dr. Vincenzo Silani receives or has received research supports from the Italian Ministry of Health (Grant RF-201302355764), Fondazione Regione per la Ricerca Biomedica Regione Lombardia (Project nr.2015-0023), and E-RARE JTC 2018 (Project Repetomics). This work was supported by the Department of Veterans Affairs, Veterans Health Administration, Biomedical Laboratory Research and Development Merit Award, Veterans Affairs Biorepository (Kowall/Brady, PIs; BX002466). We are grateful to the Dementia with Lewy Body Center at the Cleveland Clinic for providing brain tissue and DNA samples, which was supported by the grants U01 NS100610. This work at IRCCS Istituto Centro San Giovanni di Dio Fatebenefratelli was supported by the Italian Ministry of Health (Ministero della Salute, Ricerca Corrente). This work at Fondazione IRCCS Istituto Neurologico Carlo Besta was supported by the Italian Ministry of Health (Ministero della Salute, Ricerca Corrente). This work is supported by Scripps Research Translational Institute, an NIH-NCATS Clinical and Translational Science Award (CTSA; 5 UL1 RR025774). Dr. Hickman is supported by the Hereditary Disease Foundation and the Huntington's Disease Society of America. The authors would like to acknowledge the



Neurobiology Brain Bank & Research Core at the Icahn School of Medicine at Mount Sinai, New York. This research was supported/funded by the NIHR Sheffield Biomedical Research Centre (BRC) / NIHR Sheffield Clinical Research Facility (CRF). The views expressed are those of the author(s) and not necessarily those of the NHS, the NIHR, or the Department of Health and Social Care (DHSC). The tissue/data used in this research was obtained from the Human Brain Collection Core, Intramural Research Program, NIMH (<http://www.nimh.nih.gov/hbcc>). The Mayo Clinic Center for Regenerative Medicine was funded through gifts from The Sol Goldman Charitable Trust, and the Donald G. and Jodi P. Heeringa Family, the Haworth Family Professorship in Neurodegenerative Diseases fund, and The Albertson Parkinson's Research Foundation.

## Affiliations

The affiliations for the members of The American Genome Center (TAGC) are: The American Genome Center, Collaborative Health Initiative Research Program, Uniformed Services University of the Health Sciences, Bethesda, MD 20814, USA [Adelani Adeleye, Camille Alba, Dagmar Bacikova, Clifton L. Dalgard, Daniel N. Hupalo, Elisa McGrath Martinez, Harvey B. Pollard, Gauthaman Sukumar, Anthony R. Soltis, Meila Tuck, Coralie Viollet, Xijun Zhang, Matthew D. Wilkerson], Henry M. Jackson Foundation for the Advancement of Military Medicine, Inc., Bethesda, MD 20817, USA [Adelani Adeleye, Camille Alba, Dagmar Bacikova, Daniel N. Hupalo, Elisa McGrath Martinez, Gauthaman Sukumar, Anthony R. Soltis, Meila Tuck, Coralie Viollet, Xijun Zhang, Matthew D. Wilkerson], Department of Anatomy, Physiology & Genetics, Uniformed Services University of the Health Sciences, Bethesda, MD 20814, USA [Clifton L. Dalgard, Harvey B. Pollard].

The affiliations for the members of the FALS Sequencing Consortium are: Centre for Neurodegeneration Research, King's College London, Department of Clinical Neuroscience, Institute of Psychiatry, London, UK [Bradley N. Smith, Athina Soragia Gkazi, Simon D. Topp, Safa Al-Sarraj, Andrew King], Department of Neurology and Laboratory of Neuroscience, IRCCS Istituto Auxologico Italiano, Milan 20149, Italy [Nicola Ticozzi, Daniela Calini, Antonia Ratti, Vincenzo Silani], Department of Pathophysiology and Transplantation, "Dino Ferrari" Center, Università degli Studi di Milano, Milan 20122, Italy [Nicola Ticozzi, Vincenzo Silani], Department of Neurology, University of Massachusetts Medical School, Worcester, Massachusetts 01605, USA [Claudia Fallini, Jason Kost, Kevin P. Kenna, Pamela Keagle, Eric W. Danielson, Elizabeth A. Lewis, Peter C. Sapp, Diane McKenna-Yasek, Robert H. Brown, Jr., John E. Landers], UK Dementia Research Institute at King's College London, London, UK [Simon D. Topp, Christopher E. Shaw], Centre for Brain Research, University of Auckland, New Zealand [Emma L. Scotter], Nuffield Department of Clinical Neurosciences, University of Oxford, UK [Jack W. Miller, Martin R. Turner, Kevin Talbot], Department of Neurology, IRCCS Istituto Auxologico Italiano, Milan, Italy [Cinzia Tiloca, Claudia Colombrita], Maurice Wohl Clinical Neuroscience Institute, Department of Basic and Clinical Neuroscience, King's College London, London SE5 9RS, UK [Caroline Vance, Claire Troakes, Ammar Al-Chalabi, Christopher E. Shaw], Unit of Genetics of Neurodegenerative and Metabolic Diseases, Fondazione IRCCS Istituto Neurologico 'Carlo Besta', Milan 20133, Italy [Viviana Pensato, Barbara Castellotti, Franco Taroni, Cinzia Gellera], Neurogenetics Group, Division of Brain Sciences, Hammersmith Hospital Campus, Burlington Danes Building, Du Cane Road, London, UK [Jacqueline de Bellerocche], Clinical Genetics, Leiden University Medical Center, Leiden, the Netherlands [Frank Baas], Department of Neurogenetics and Neurology, Academic Medical Centre, Amsterdam, the Netherlands [Anneloor L.M.A. ten Asbroek], Population Genetics Laboratory, Smurfit Institute of Genetics, Trinity College Dublin, Dublin, Republic of Ireland [Russell L. McLaughlin], Department of Neurology, Emory University, Atlanta, GA 30322, USA [Meraida Polak, Seneshaw Asress, Jonathan D. Glass], Unidad de ELA, Instituto de Investigación Hospital 12 de Octubre de Madrid, SERMAS, and Centro de Investigación Biomédica en Red de Enfermedades Raras (CIBERER U-723), Madrid, Spain [Jesús Esteban-Pérez, Alberto García-Redondo], Unidad de ELA, Instituto de Investigación Hospital Gregorio Marañón de Madrid, SERMAS, Spain [José Luis Muñoz-Blanco], Neurology Clinic, Clinical Center of Serbia School of Medicine, University of Belgrade, Serbia [Zorica Stevic], Department of Health Sciences, University of Eastern Piedmont, Novara, Italy [Sandra D'Alfonso, Lucia Corrado], ALS Center, the Azienda Ospedaliero Universitaria Maggiore della Carità, Novara, Italy [Letizia Mazzini], Neurology Unit, IRCCS Foundation Ca' Granda Ospedale Maggiore Policlinico, Milan, Italy [Giacomo P. Comi, Roberto Del Bo, Stefania Corti], Experimental Neurobiology Laboratory, 'C. Mondino' National Institute of Neurology Foundation, IRCCS, Pavia, Italy [Mauro Ceroni, Stella Gagliardi, Cristina Cereda], Department of Neurosciences, University of Padova, Padova, Italy [Giorgia Querin, Cinzia Bertolin, Gianni Sorarù], Department of Neurology, Brain Center Rudolf Magnus, University Medical Center Utrecht, Utrecht, the Netherlands [Wouter van Rheenen, Frank P. Diekstra, Jan H. Veldink, Leonard H. van den Berg], Department of Neuroscience, Mayo Clinic, Jacksonville, Florida, USA [Rosa Rademakers, Marka van Blitterswijk], Department of Neurology, Mayo Clinic Florida, Jacksonville, Florida 32224, USA [Kevin B. Boylan], 3rd Neurology Unit, Motor Neuron Diseases Center, Fondazione IRCCS Istituto Neurologico 'Carlo Besta', Milan, Italy [Giuseppe Lauria], Department of Biomedical Sciences, Humanitas University, Via Rita Levi Montalcini 4, 20090 Pieve Emanuele, Milan, Italy [Stefano Duga], Humanitas Clinical and Research

Center, IRCCS, Via Manzoni 56, 20089 Rozzano, Milan, Italy [Stefano Duga], Centre for Motor Neuron Disease Research, Department of Biomedical Sciences, Faculty of Medicine and Health Sciences, Macquarie University, Sydney, New South Wales, Australia [Kelly L. Williams, Garth A. Nicholson, Ian P. Blair], Human Genetics and Cognitive Functions Unit, Institut Pasteur, Paris, France [Claire Leblond-Manry], Montreal Neurological Institute, Department of Neurology and Neurosurgery, McGill University, Montreal, Quebec, Canada [Guy A. Rouleau], Academic Unit of Neurology, Trinity Biomedical Sciences Institute, Trinity College Dublin, Dublin, Republic of Ireland [Orla Hardiman], Faculty of Medicine, Health and Life Sciences, Queen's University Belfast [Karen E. Morrison], School of Clinical and Experimental Medicine, University of Birmingham, Birmingham, UK [Hardev Pall], Sheffield Institute for Translational Neuroscience, Department of Neuroscience, University of Sheffield, Sheffield S10 2HQ, UK [Pamela J. Shaw], Department of Bioinformatics and Computational Biology, Worcester Polytechnic Institute, Worcester, MA 01609, USA [Zheyang Wu].

The affiliations for the members of The Genomics England Research Consortium are: Genomics England, London, UK [John C. Ambrose, Prabhu Arumugam, Emma L. Baple, Marta Bleda, Freya Boardman-Pretty, Jeanne M. Boissiere, Christopher R. Boustred, H. Brittain, Mark J. Caulfield, Georgia C. Chan, Clare E.H. Craig, Louise C. Daugherty, Anna de Burca, Andrew Devereau, Greg Elgar, Rebecca E. Foulger, Tom Fowler, Pedro Furió-Tarí, Joanne M. Hackett, Dina Halai, Angela Hamblin, Shirley Henderson, James E. Holman, Tim J.P. Hubbard, Kristina Ibáñez, Rob Jackson, Louise J. Jones, Dalia Kasperaviciute, Melis Kayikci, Lea Lahnstein, Kay Lawson, Sarah E.A. Leigh, Ivonne U.S. Leong, Javier F. Lopez, Fiona Maleady-Crowe, Joanne Mason, Ellen M. McDonagh, Loukas Moutsianas, Michael Mueller, Nirupa Murugaesu, Anna C. Need, Chris A. Odhams, Christine Patch, Daniel Perez-Gil, Dimitris Polychronopoulos, John Pullinger, Tahrima Rahim, Augusto Rendon, Pablo Riesgo-Ferreiro, Tim Rogers, Mina Ryten, Kevin Savage, Kushmita Sawant, Richard H. Scott, Afshan Siddiq, Alexander Sieghart, Damian Smedley, Katherine R. Smith, Alona Sosinsky, William Spooner, Helen E. Stevens, Alexander Stuckey, Razvan Sultana, Ellen R.A. Thomas, Simon R. Thompson, Carolyn Tregidgo, Arianna Tucci, Emma Walsh, Sarah A. Watters, Matthew J. Welland, Eleanor Williams, Katarzyna Witkowska, Suzanne M. Wood, Magdalena Zarowiecki], William Harvey Research Institute, Queen Mary University of London, London, EC1M 6BQ, UK [Freya Boardman-Pretty, Mark J. Caulfield, Greg Elgar, Shirley Henderson, Kristina Ibáñez, Louise J. Jones, Dalia Kasperaviciute, Ellen M. McDonagh Loukas Moutsianas, Michael Mueller, Anna C. Need, Christine Patch, Damian Smedley, Katherine R. Smith, Alona Sosinsky, Ellen R.A. Thomas, Arianna Tucci, Katarzyna Witkowska, Suzanne M. Wood].

The affiliations for the members of The International ALS Genomics Consortium (iALSgc) are: Neuromuscular Diseases Research Section, Laboratory of Neurogenetics, National Institute on Aging, Bethesda, MD, 20892, USA [Yevgeniya Abramzon, Ruth Chia, Alan E. Renton, Bryan J. Traynor], Sobell Department of Motor Neuroscience and Movement Disorders, Institute of Neurology, University College London, London, WC1N 3BG, UK [Yevgeniya Abramzon, Pietro Fratta], Genomics Technology Group, Laboratory of Neurogenetics, National Institute on Aging, Bethesda, MD, 20892, USA [Sampath Arepalli, Dena G. Hernandez], Human Brain Collection Core, National Institute of Mental Health, Bethesda, MD, 20892, USA [Pavan Auluck], Department of Neurology, Cedars-Sinai Medical Center, Los Angeles, CA, 90048, US [Robert H. Baloh], Division of Neurology, Barrow Neurological Institute, Phoenix, AZ, 85013, USA [Robert Bowser], Research and Development Service, Veterans Affairs Boston Healthcare System, Boston, MA, 02130, USA [Christopher B. Brady], Department of Neurology & Program in Behavioral Neuroscience, Boston University School of Medicine, 72 E Concord St, Boston, MA, 02118, USA [Christopher B. Brady], Centre de Recherche de l'Institut du Cerveau et de la Moelle épinière, Université Pierre et Marie Curie, Paris, France [Alexis Brice, Isabelle Le Ber], INSERM U975, Paris, France [Alexis Brice, Isabelle Le Ber], Department of Biochemistry, Penn State College of Medicine, Hershey, PA, 17033, USA [James Broach], ALS reference center, Gui de Chauillac Hospital, CHU and Univ Montpellier, Montpellier France [William Camu], ALS Center, 'Rita Levi' Montalcini' Department of Neuroscience, University of Turin, Via Verdi 8, Turin, 10124, Italy [Adriano Chiò], ALS Center, Azienda Ospedaliero Universitaria Città della Salute e della Scienza, Corso Bramante, 88, Turin, 10126, Italy [Adriano Chiò], Institute of Cognitive Sciences and Technologies, C.N.R., Via S. Martino della Battaglia, 44, Rome, 00185, Italy [Adriano Chiò], Department of Neuroscience, University of Sheffield, Sheffield, S10 2HQ, UK [John Cooper-Knock, Janine Kirby, Pamela J. Shaw], Centre Constitutif SLA, Tours-Fédération des centres SLA

Tours-Limoges, LITORALS, Tours, France [Philippe Corcia], Computational Biology Group, Laboratory of Neurogenetics, National Institute on Aging, Bethesda, MD, 20892, USA [Jinhui Ding, J. Raphael Gibbs], Institute for Clinical Neurobiology, University of Würzburg, Würzburg, D-97078, Germany [Carsten Drepper], Department of Neurology, Tel-Aviv Sourasky Medical Center, Tel-Aviv, Israel [Vivian E. Drory], Department of Pathology, Penn State College of Medicine, Hershey, PA, 17033, USA [Travis L. Dunckley, Glenn Gerhard], Molecular Genetics Section, Laboratory of Neurogenetics, National Institute on Aging, Bethesda, MD, 20892, USA [Faraz Faghri, Mike A. Nalls, Andrew B. Singleton], Motor Neuron Disorders Unit, Neurogenetics Branch, National Institute of Neurological Disorders and Stroke, Bethesda, MD, 20892, USA [Jennifer Farren, Mary Kay Floeter], Department of Neurology, University of Michigan, 1500 E Medical Center Dr, Ann Arbor, MI, 48109, USA [Eva Feldman, Stephen A. Goutman], Department of Neurology, University of Utah School of Medicine, 175 North Medical Drive East, Salt Lake City, UT, 84132, USA [Summer B. Gibson, Stefan M. Pulst], Department of Neurology, Emory University School of Medicine, Atlanta, GA, 30322, USA [Jonathan D. Glass], Department of Neurodegenerative Disease, UCL Queen Square Institute of Neurology, University College London, Queen Square, London, WC1N 3BG, UK [John A. Hardy], UK Dementia Research Institute at UCL and Department of Neurodegenerative Disease, UCL Queen Square Institute of Neurology, University College London, Queen Square, London, WC1N 3BG, UK [John A. Hardy], Reta Lila Weston Institute, UCL Queen Square Institute of Neurology, University College London, 1 Wakefield Street, London, WC1N 1PJ, UK [John A. Hardy], NINR University College London Hospitals Biomedical Research Centre, University College London, 149 Tottenham Court Road, London, W1T 7DN, UK [John A. Hardy], Institute for Advanced Study, The Hong Kong University of Science and Technology, Hong Kong SAR, China [John A. Hardy], Department of Neurology, Columbia University, New York, NY, 10032, USA [Matthew B. Harms], Department of Neurology, Drexel University College of Medicine, Philadelphia, PA, 19102, USA [Terry D. Heiman-Patterson], Department of Neurology, Temple University, 7602 Central Ave, Philadelphia, PA, 19111, USA [Terry D. Heiman-Patterson], Columbia University Irving Medical Center, New York, NY, 10032, USA [Ben Hoover], Department of Neurology, Neurocenter, Helsinki University Hospital, Helsinki, FIN-02900, Finland [Lilja Jansson, Hannu Laaksovirta, Pentti J. Tienari, Miko Valori], Translational Immunology Research Program, Biomedicum, University of Helsinki, Helsinki, FIN-02900, Finland [Lilja Jansson, Hannu Laaksovirta, Pentti J. Tienari, Miko Valori], Epidemiology Branch, National Institute of Environmental Health Sciences, Durham, NC, 27709, USA [Freya Kamel], Department of Neurology, Veterans Affairs Boston Healthcare System, 150 S Huntington Ave, Boston, MA, 02130, USA [Neil W. Kowall], Boston University Alzheimer's Disease Center, Boston University School of Medicine, 72 E Concord St, Boston, MA, 02118, USA [Neil W. Kowall], Department of Neurology, University of Massachusetts Medical School, Worcester, MA, 01605, USA [John E. Landers], Fondazione Policlinico Universitario "Agostino Gemelli" IRCCS, Catholic University of the Sacred Heart, L.go F. Vito 8, Rome, 168, Italy [Francesco Landi], Service de Biochimie et Biologie Moléculaire, CHU Nîmes, University Montpellier, Nîmes, France [Serge Lumbroso, Kevin Mouzat], New York Hospital Cornell University Medical Center, 1305 York Avenue, NYC, NY, 10021 [Daniel J.L. MacGowan], Department of Neurology, Johns Hopkins University, Baltimore, MD, 21287, USA [Nicholas J. Maragakis, Lyle W. Ostrow, Jeffrey D. Rothstein, Sonja W. Scholz, Bryan J. Traynor], ALS Center, ICS Maugeri, IRCCS, Via Camaldoli, 64, Milan, 20138, Italy [Gabriele Mora], Department of Pathology, HUSLAB, University of Helsinki and Helsinki University Hospital, Helsinki, FIN-00014, Finland [Liisa Myllykangas], Data Tecnica International, Glen Echo, MD, 20812, USA [Mike A. Nalls], Department of Clinical Neuroscience, Institute of Neurology, University College London, London, NW2 2PG, UK [Richard W. Orrell], Discipline of Pathology, Brain and Mind Centre, University of Sydney, Camperdown, NSW 2050, Australia [Roger Pamphlett], Faculty of Human and Medical Sciences, University of Manchester, Manchester, M13 9PT, UK [Stuart Pickering-Brown], Department of Neurology, Cleveland Clinic, Cleveland, OH, 44195, USA [Erik Pioro], Department of Neuroscience, Experimental Neurology and Leuven Research Institute for Neuroscience and Disease, University of California San Diego, 9500 Gilman Drive, La Jolla, CA, 92093, USA [John M. Ravits], Department of Neuroscience, Ronald M. Loeb Center for Alzheimer's Disease, Icahn School of Medicine at Mount Sinai, New York, NY, 10029, USA [Alan E. Renton], Department of Neurosciences, Experimental Neurology and Leuven Research Institute for Neuroscience and Disease, University of Leuven, Leuven, 3000, Belgium [Wim Robberecht, Philip Van Damme, Ludo Van Den Bosch], Veterans Affairs Biorepository Brain Bank, Southern Arizona Veterans Affairs Healthcare System, Tucson, AZ, 85723, USA [Ian Robey], Division of Neurology, Tanz

Centre for Research of Neurodegenerative Diseases, University of Toronto, Toronto, M5S 3H2, Canada [Ekaterina Rogaeva], Neurodegenerative Diseases Research Unit, Laboratory of Neurogenetics, National Institute of Neurological Disorders and Stroke, Bethesda, MD, 20892, USA [Sonja W. Scholz], Department of Neurology, Institute for Clinical Neurobiology, University of Würzburg, Würzburg, D-97078, Germany [Michael Sendtner], Department of Molecular Neuroscience and Reta Lila Weston Laboratories, Institute of Neurology, University College London, London, WC1N 3BG, UK [Katie C. Sidle], Department of Neurology, Penn State College of Medicine, Hershey, PA, 17033, USA [Zachary Simmons], Cerevel Therapeutics, LLC, Boston, MA 02116, USA [David J. Stone], Department of Pathology and Laboratory Medicine, University of Pennsylvania, Philadelphia, PA, 19104, USA [John Q. Trojanowski, Vivianna M. Van Deerlin], Clinical and Neuropathology Core, Johns Hopkins University, Baltimore, MD, 21287, USA [Juan C. Troncoso], VIB, Center for Brain & Disease Research, Laboratory of Neurobiology, University of Leuven, Leuven, 3000, Belgium [Philip Van Damme, Ludo Van Den Bosch], Division of Neurology, Sunnybrook Health Sciences Centre, University of Toronto, Toronto, M4N 3M5, Canada [Lorne Zinman].

The affiliations for the members of the International FTD Genetics Consortium (IFGC) are: Department of Neuroscience, IRCCS - Istituto di Ricerche Farmacologiche "Mario Negri", Milan, Italy [Diego Albani], Molecular Markers Laboratory, IRCCS Istituto Centro San Giovanni di Dio Fatebenefratelli, Brescia, Italy [Luisa Benussi, Roberta Ghidoni, Giuliano Binetti], MAC Memory Clinic, IRCCS Istituto Centro San Giovanni di Dio Fatebenefratelli, Brescia, Italy [Giuliano Binetti], Centre for Neurodegenerative Disorders, Department of Clinical and Experimental Sciences, University of Brescia, Brescia, Italy [Barbara Borroni, Alessandro Padovani], Regional Neurogenetic Centre, ASPCZ, Lamezia Terme, Italy [Amalia Bruni], Sant Pau Biomedical Research Institute, Hospital de la Santa Creu i Sant Pau, Universitat Autònoma de Barcelona, Barcelona, Spain [Jordi Clarimon, Oriol Dols-Icardo, Ignacio Illán-Gala, Alberto Lleó], Centro de Investigación Biomédica en Red de Enfermedades Neurodegenerativas (CIBERNED), Instituto de Salud Carlos III, Madrid, Spain [Jordi Clarimon, Oriol Dols-Icardo, Alberto Lleó], Instituto de Investigación Sanitaria del Principado de Asturias, Oviedo, Asturias, Spain [Ignacio Illán-Gala], Neurologische Klinik und Poliklinik, Ludwig-Maximilians-Universität, Munich, Germany [Adrian Danek], German Center for Neurodegenerative Diseases (DZNE), Munich, Germany [Adrian Danek], University of Milan, Dino Ferrari Center, Milan, Italy [Daniela Galimberti, Elio Scarpini, Maria Serpente], Fondazione IRCCS Ca' Granda, Ospedale Policlinico, Milan, Italy [Daniela Galimberti, Elio Scarpini, Maria Serpente], Karolinska Institutet, Dept NVS, Division of Neurogeriatrics, Bioclinicum Solna, Sweden [Caroline Graff, Huei-Hsin Chiang, Behzad Khoshnood, Linn Öijerstedt], Department of Neurology, Skåne University Hospital, Malmö, Sweden [Caroline Graff], Karolinska University Hospital, Unit for Hereditary Dementias, Theme Aging, Solna, Sweden [Huei-Hsin Chiang, Behzad Khoshnood, Linn Öijerstedt], Division of Clinical Sciences Helsingborg, Department of Clinical Sciences Lund, Lund University, Lund, Sweden [Maria L. Waldö, Per M. Johansson], Clinical Memory Research Unit, Department of Clinical Sciences, Lund University, Skåne University Hospital, 205 02 Malmö, Sweden [Christer F. Nilsson], Division of Neuroscience & Experimental Psychology, University of Manchester, Manchester, UK [Stuart Pickering-Brown], Newcastle Brain Tissue Resource, Institute of Neuroscience, Newcastle University, Edwardson Building, Campus for Ageing and Vitality, Newcastle upon Tyne, NE4 5PL, UK [Christopher M. Morris], Department of Neuroscience, Psychology, Drug Research and Child Health, University of Florence, Florence, Italy [Benedetta Nacmias, Sandro Sorbi], IRCCS Fondazione Don Carlo Gnocchi, Florence, Italy [Benedetta Nacmias, Sandro Sorbi], Danish Dementia Research Centre, Neurogenetics Clinic, Department of Neurology, Rigshospitalet, Copenhagen University Hospital, Denmark [Jorgen E. Nielsen, Lynne E. Hjermand], Department of Cellular and Molecular Medicine, Section of Neurogenetics, The Panum Institute, University of Copenhagen, Denmark. [Jorgen E. Nielsen, Lynne E. Hjermand], Fondazione Policlinico Universitario A. Gemelli IRCCS, Rome, Italy [Valeria Novelli], Istituto di Medicina Genomica, Università Cattolica del sacro Cuore, Rome, Italy [Valeria Novelli], Cardiovascular Research Unit, IRCCS Multimedica, Milan, Italy [Annibale A. Puca], Department of Medicine and Surgery, University of Salerno, Baronissi (SA), Italy [Annibale A. Puca], Memory Disorders Unit, Department of Neurology, University Hospital Mutua de Terrassa, Terrassa, Barcelona, Spain [Pau Pastor, Ignacio Alvarez, Monica Diez-Fairen, Miquel Aguilar], Fundació per la Recerca Biomèdica i Social Mútua Terrassa, Terrassa, Barcelona, Spain [Pau Pastor, Ignacio Alvarez, Monica Diez-Fairen], Neuroepidemiology and Ageing Research Unit, School of Public Health, Faculty of Medicine, The Imperial College of Science, Technology and Medicine, London, UK [Robert Pernecky], West London Cognitive Disorders Treatment and

Research Unit, West London Mental Health Trust, London TW8 8 DS, UK [Robert Perneckzy], Department of Psychiatry and Psychotherapy, Technische Universität München, Munich, Germany. [Robert Perneckzy, Janine Diehl-Schimd], Tanz Centre for Research in Neurodegenerative Diseases, University of Toronto, Toronto, ON, Canada [Ekaterina Rogaeva], Division of Neurology V and Neuropathology, Fondazione IRCCS Istituto Neurologico Carlo Besta, Milano, Italy [Mina Rossi, Paola Caroppo], Scientific Directorate, Fondazione IRCCS Istituto Neurologico Carlo Besta, Milano, Italy [Fabrizio Tagliavini], Research Center and Memory Clinic. Fundació ACE, Institut Català de Neurociències Aplicades, Universitat Internacional de Catalunya (UIC), Barcelona, Spain [Agustin Ruiz, Mercè Boada, Isabel Hernández, Sonia Moreno-Grau], Fundació per la Recerca Biomèdica i Social Mútua Terrassa, Terrassa, Barcelona, Spain [Agustin Ruiz, Mercè Boada, Isabel Hernández, Sonia Moreno-Grau], Department of Psychiatry and Psychotherapy, University of Freiburg Medical School, Germany [Johannes C Schlachetzki], Department of Molecular Neurology, University Hospital Erlangen, Erlangen, Germany [Johannes C Schlachetzki].

The affiliations for the members of The International LBD Genomics Consortium (iLBDgc) are: Department of Old Age Psychiatry, Institute of Psychiatry, Psychology and Neuroscience (IoPPN), King's College London, London, SE5 8AF, UK [Dag Aarsland, Angela K. Hodges, Claire Troakes], Neuromuscular Diseases Research Section, Laboratory of Neurogenetics, National Institute on Aging, Bethesda, MD 20892, USA [Yevgeniya Abramzon, Ruth Chia, Bryan J. Traynor], Neurodegenerative Diseases Research Unit, Laboratory of Neurogenetics, National Institute of Neurological Disorders and Stroke, Bethesda, MD 20892, USA [Sarah Ahmed, Marya S. Sabir, Sonja W. Scholz], Department of Anatomy, Physiology and Genetics, Physiology and Genetics, Uniformed Services University of the Health Sciences, Bethesda, MD 20814, USA [Camille Alba, Dagmar Bacikova, Clifton L. Dalgard, Heng-Chen Hu, Daniel Hupalo, Elisa Martinez-McGrath, Coralie Viollet], Department of Neurology, Johns Hopkins University Medical Center, Baltimore, MD 21287, USA [Marilyn S. Albert, Sonja W. Scholz, Bryan J. Traynor], Department of Clinical Neuropathology and London Neurodegenerative Diseases Brain Bank, Institute of Psychiatry, Psychology and Neuroscience (IoPPN), King's College Hospital and King's College London, London, SE5 8AF, UK [Safa Al-Sarraj], Newcastle Brain Tissue Resource, Biomedical Research Building, Translational and Clinical Research Institute, Newcastle University, Newcastle upon Tyne, NE4 5PL, UK [Johannes Attems, Ian McKeith, Christopher M. Morris, Alan J. Thomas], Department of Neurology, University of Virginia School of Medicine, Charlottesville, VA 22903, USA [Matthew J. Barrett], Civin Laboratory for Neuropathology, Banner Sun Health Research Institute, Sun City, AZ 85006, USA [Thomas G. Beach, Geidy E. Serrano], Genomic Medicine Institute, Cleveland Clinic, Cleveland, OH 44195, USA [Lynn M. Bekris], Rush Alzheimer's Disease Center, Rush University, Chicago, IL 60612, USA [David A. Bennett, Gregory Klein], Institute for Human Health and Disease Intervention, Florida Atlantic University, Boca Raton, FL 33431, USA [Lilah M. Besser], Mesulam Center for Cognitive Neurology and Alzheimer's Disease, Northwestern University Feinberg School of Medicine, Chicago, IL 60611, USA [Eileen H. Bigio, Margaret E. Flanagan, Qinwen Mao, Marek-Marsel Mesulam], Institute of Medical Science, Faculty of Medicine, University of Toronto, Toronto, ON M5S 1A8, Canada [Sandra E. Black], Division of Neurology, Department of Medicine, University of Toronto, Toronto, ON M5S 1A1, Canada [Sandra E. Black], Heart and Stroke Foundation Canadian Partnership for Stroke Recovery, Sunnybrook Health Sciences Centre, University of Toronto, Toronto, ON M5S 1A8, Canada [Sandra E. Black], Hurvitz Brain Sciences Research Program, Sunnybrook Research Institute, University of Toronto, Toronto, ON M4N 3M5, Canada [Sandra E. Black, Mario Masellis], LC Campbell Cognitive Neurology Research Unit, Sunnybrook Research Institute, University of Toronto, Toronto, ON M4N 3M5, Canada [Sandra E. Black, Mario Masellis], Center for Sleep Medicine, Mayo Clinic, Rochester, MN 55905, USA [Bradley F. Boeve], Department of Neurobiology and Behavior, University of California Irvine, Irvine, CA 92697, USA [Ryan C. Bohannon], Dublin Brain Bank, Neuropathology Department, Beaumont Hospital, Dublin, D2, Ireland [Francesca Brett], Paris Brain Institute, Sorbonne Universites, Paris, CS 21 414 – 75646, France [Alexis Brice, Suzanne Lesage], Rita Levi Montalcini Department of Neuroscience, University of Turin, Turin, 10126, Italy [Maura Brunetti, Andrea Calvo, Antonio Canosa, Adriano Chiò], Institute for Memory Impairments and Neurological Disorders, University of California Irvine, Irvine, CA 92697, USA [Chad A. Caraway], Department of Neurology, New York University School of Medicine, New York, NY 10016, USA [Jose-Alberto Palma, Horacio Kaufmann, Lucy Norcliffe-Kaufmann], Institute of Cognitive Sciences and Technologies, C.N.R., Rome, 185, Italy [Adriano Chiò], Azienda Ospedaliero Universitaria Città della Salute e della Scienza, Turin, 10126, Italy [Adriano Chiò], Sant Pau Biomedical Research Institute,

Hospital de la Santa Creu i Sant Pau, Universitat Autònoma de Barcelona, Barcelona, 08041, Spain [Jordi Clarimon], The American Genome Center, Collaborative Health Initiative Research Program, Uniformed Services University of the Health Sciences, Bethesda, MD 20814, USA [Clifton L. Dalgard], Department of Neuroscience, Mayo Clinic, Jacksonville, FL 32224, USA [Dennis Dickson, Ronald L. Walton], Memory and Movement Disorders Units, Department of Neurology, University Hospital Mutua de Terrassa, Barcelona, 08221, Spain [Monica Diez-Fairen, Pau Pastor], Computational Biology Group, Laboratory of Neurogenetics, National Institute on Aging, Bethesda, MD 20892, USA [Jinhui Ding, Jesse Raphael Gibbs], Department of Neuropathology Escourolle, Paris Brain Institute, Sorbonne Universites, Paris, CS 21 414 – 75646, France [Charles Duyckaerts], Department of Medical and Molecular Genetics, Indiana University School of Medicine, Indianapolis, IN 46202, USA [Kelley Faber, Tatiana M. Foroud], Department of Psychiatry and Psychology, Mayo Clinic, Jacksonville, FL 32224, USA [Tanis Ferman], Department of Molecular Neuroscience, Institute of Neurology, University College London, London, WC1B 5EH, UK [Raffaele Ferrari, John A. Hardy, Huw R. Morris, Mina Ryten], Longitudinal Studies Section, National Institute on Aging, Baltimore, MD 21224, USA [Luigi Ferrucci, Toshiko Tanaka], Department of Neurology, University Hospital of Cagliari, Cagliari, 9124, Italy [Gianluca Floris], Universitat Autònoma de Barcelona, Barcelona, 08041, Spain [Juan Fortea], Montreal Neurological Institute and Hospital, Department of Neurology & Neurosurgery, McGill University, Montreal, QC H3A 2B4, Canada [Ziv Gan-Or], Neuropathology Unit, Division of Brain Sciences, Department of Medicine, Imperial College London, London, W12 0NN, UK [Steve Gentleman, Bension S. Tilley], Department of Pathology and Laboratory Medicine, Indiana University School of Medicine, Indianapolis, IN 46202, USA [Bernardino Ghetti, Kathy L. Newell], Nash Family Department of Neuroscience, Department of Genetics and Genomic Sciences, and Department of Pathology, Icahn School of Medicine at Mount Sinai, New York, NY 10029, USA [Alison Goate], Clinical Neurocardiology Section, National Institute of Neurological Disorders and Stroke, Bethesda, MD 20892, USA [David Goldstein], Neurology Service, University Hospital Marqués de Valdecilla-IDIVAL-UC-CIBERNED, Santander, 39011, Spain [Isabel González-Aramburu, Jon Infante, Carmen Lage, Eloy Rodríguez-Rodríguez, Pascual Sanchez-Juan], Department of Neurology, Mayo Clinic, Jacksonville, FL 32224, USA [Neill R. Graff-Radford, Zbigniew K. Wszolek], Sleep Disorders Center, Neurology Service, Hospital Clinic de Barcelona, IDIBAPS, CIBERNED, University of Barcelona, Barcelona, 08036, Spain [Alex Iranzo], Department of Neuropathology, Indiana University School of Medicine, Indianapolis, IN 46202, USA [Scott M. Kaiser], Department of Anatomical Pathology, Sunnybrook Health Sciences Centre, University of Toronto, Toronto, ON M5S 1A8, Canada [Julia Keith], Department of Neuropathology, School of Medicine, University of California Irvine, Irvine, CA 92697, USA [Ronald C. Kim], Luxembourg Center for Systems Biomedicine, University of Luxembourg, Luxembourg, L-4362, Luxembourg [Rejko Krüger, Patrick May], Luxembourg Institute of Health (LIH), University of Luxembourg, Luxembourg, L-4362, Luxembourg [Rejko Krüger], Centre Hospitalier de Luxembourg (CHL), University of Luxembourg, Luxembourg, L-4362, Luxembourg [Rejko Krüger], National Alzheimer's Coordinating Center (NACC), University of Washington, Seattle, WA 98195, USA [Walter Kukull], Department of Pathology and Laboratory Medicine, Perelman School of Medicine, University of Pennsylvania, Philadelphia, PA 19104, USA [Amanda Kuzma], Neurology Department, Sant Pau Biomedical Research Institute, Hospital de la Santa Creu i Sant Pau, Universitat Autònoma de Barcelona, Barcelona, 08041, Spain [Alberto Lleó], Lou Ruvo Center for Brain Health, Department of Neurology, Neurological Institute, Cleveland Clinic, Cleveland, OH 44195, USA [James B. Leverenz], Department of Basic Medical Sciences, Neurosciences and Sense Organs, University of Bari "Aldo Moro", Bari, 70121, Italy [Giancarlo Logroscino, Chiara Zecca], Medical Genetics Branch, National Human Genome Research Institute, Bethesda, MD 20892, USA [Grisel Lopez, Ellen Sidransky, Nahid Tayebi], Dementia Research Group, School of Clinical Sciences, University of Bristol, Bristol, BS10 5NB, UK [Seth Love], Parkinson's Disease and Movement Disorders Unit, Neurology Service, Hospital Clímic, IDIBAPS, CIBERNED, University of Barcelona, Barcelona, 08036, Spain [Maria Jose Marti], Cognitive & Movement Disorders Clinic, Sunnybrook Health Sciences Centre, University of Toronto, Toronto, ON M5S 1A8, Canada [Mario Masellis], Department of Medicine, Division of Neurology, University of Toronto, Toronto, ON M5S 1A8, Canada [Mario Masellis], Molecular Neuropathology Section, Laboratory of Neurogenetics, National Institute on Aging, Bethesda, MD 20892, USA [Eliezer Masliah], Department of Pathology & Laboratory Medicine, School of Medicine, University of California Irvine, Irvine, CA 92697, USA [Edwin S. Monuki], Department of Clinical and Movement Neuroscience, Royal Free Campus UCL Institute of Neurology, University College London,

London, NW3 2PF, UK [Huw R. Morris], South West Dementia Brain Bank, Bristol Medical School, University of Bristol, Bristol, BS10 5NB, UK [Laura Palmer], Michigan Brain Bank, University of Michigan Medical School, Ann Arbor, MI 48109, USA [Matthew Perkins], Division of Neuroscience and Experimental Psychology, Faculty of Biology, Medicine and Health, The University of Manchester, Manchester, M13 9PT, UK [Stuart Pickering-Brown], Department of Pathology (Neuropathology), Johns Hopkins University Medical Center, Baltimore, MD 21287, USA [Olga Pletnikova, Juan C. Troncoso], Neurological Tissue Bank, Biobanc-Hospital Clinic - IDIBAPS, Barcelona, 08036, Spain [Laura Molina-Porcel], Alzheimer's disease and other cognitive disorders unit, Neurology Service, Hospital Clínic, IDIBAPS, University of Barcelona, Barcelona, 08036, Spain [Laura Molina-Porcel], Department of Neuroscience, Icahn School of Medicine at Mount Sinai, New York, NY 10029, USA [Alan E. Renton], Laboratory of Behavioral Neuroscience, National Institute on Aging, Baltimore, MD 21224, USA [Susan M. Resnick], Department of Neurodegenerative Diseases, Institute of Neurology, University College London, London, WC1B 5EH, UK [Regina H. Reynolds], Tanz Centre for Research in Neurodegenerative Diseases, University of Toronto, Toronto, ON M5S 1A8, Canada [Ekaterina Rogaeva], Department of Neurodegenerative Diseases, Dementia Research Centre, University College London, London, WC1N 3BG, UK [Jonathan D. Rohrer], Department of Neuroscience & Department of Clinical Genomics, Mayo Clinic, Jacksonville, FL 32224, USA [Owen A. Ross], Precision Neurology Program, Brigham & Women's Hospital, Harvard Medical School, Boston, MA 2115, USA [Clemens R. Scherzer], Department of Neurology, University of Michigan Medical School, Ann Arbor, MI 48109, USA [Vikram Shakkottai], Molecular Genetics Section, Laboratory of Neurogenetics, National Institute on Aging, Bethesda, MD 20892, USA [Andrew B. Singleton], Department of Neurology, Oregon Health & Sciences University, Portland, OR 97239, USA [Randy Woltjer], Department of Neurology, University Hospital of Larissa, University of Thessalia, Larissa, 41110, Greece [Georgia Xiromerisiou].

The affiliations for the members of The NYGC ALS Consortium are: Center for Genomics of Neurodegenerative Disease (CGND), New York Genome Center, New York, NY [Hemali Phatnani], Department of Neurology, Lewis Katz School of Medicine, Temple University, Philadelphia, PA [Justin Kwan], Cedars-Sinai Department of Biomedical Sciences, Board of Governors Regenerative Medicine Institute and Brain Program, Cedars-Sinai Medical Center, and Department of Medicine, University of California, Los Angeles, CA [Dhruv Sareen], Department of Biochemistry and Molecular Biology, Penn State Institute for Personalized Medicine, The Pennsylvania State University, Hershey, PA [James R. Broach], Department of Neurology, The Pennsylvania State University, Hershey, PA [Zachary Simmons], Department of Neurology, Henry Ford Health System, Detroit, MI [Ximena Arcila-Londono], Department of Pathology and Laboratory Medicine, Perelman School of Medicine, University of Pennsylvania, Philadelphia, PA [Edward B. Lee], Department of Pathology and Laboratory Medicine, Perelman School of Medicine, University of Pennsylvania, Philadelphia, PA [Vivianna M. Van Deerlin], Department of Neurology, Center for Motor Neuron Biology and Disease, Institute for Genomic Medicine, Columbia University, New York, NY [Neil A. Shneider], Department of Biological Engineering, Massachusetts Institute of Technology, Cambridge, MA [Ernest Fraenkel], Department of Neurology, Johns Hopkins School of Medicine, Baltimore, MD [Lyle W. Ostrow], Department of Neurogenetics, Academic Medical Centre, Amsterdam and Leiden University Medical Center, Leiden, The Netherlands [Frank Baas], Department of Medicine, Lung Biology Center, University of California, San Francisco, CA [Noah Zaitlen], ALS Multidisciplinary Clinic, Neuromuscular Division, Department of Neurology, Harvard Medical School, and Neurological Clinical Research Institute, Massachusetts General Hospital, Boston, MA [James D. Berry], Centre for Neuroscience and Trauma, Blizard Institute, Barts and The London School of Medicine and Dentistry, Queen Mary University of London, London, and Department of Neurology, Basildon University Hospital, Basildon, United Kingdom [Andrea Malaspina], Institute of Neurology, National Hospital for Neurology and Neurosurgery, University College London, London, United Kingdom [Pietro Fratta], The Jackson Laboratory, Bar Harbor, ME [Gregory A. Cox], Department of Psychiatry & Human Behavior, Department of Biological Chemistry, School of Medicine, and Department of Neurobiology and Behavior, School of Biological Sciences, University California, Irvine, CA [Leslie M. Thompson], Taube/Koret Center for Neurodegenerative Disease Research, Roddenberry Center for Stem Cell Biology and Medicine, Gladstone Institutes, San Francisco, CA [Steve Finkbeiner], Department of Neurology & Sensory Organs, University of Thessaly, Thessaly, Greece [Efthimios Dardiotis], Department of Neurology, Washington University in St. Louis, St. Louis, MO [Timothy M. Miller], Centre for Clinical Brain Sciences, Anne Rowling Regenerative Neurology Clinic, Euan



MacDonald Centre for Motor Neurone Disease Research, University of Edinburgh, Edinburgh, United Kingdom [Siddharthan Chandran], Centre for Clinical Brain Sciences, Anne Rowling Regenerative Neurology Clinic, Euan MacDonald Centre for Motor Neurone Disease Research, University of Edinburgh, Edinburgh, United Kingdom [Suvankar Pal], Department of Molecular Genetics, Weizmann Institute of Science, Rehovot, Israel [Eran Hornstein], New York Hospital, Cornell University Medical Center, NYC, NY [Daniel J. MacGowan], Center for Neurodegenerative Disorders, Department of Neurology, the Lewis Katz School of Medicine, Temple University, Philadelphia, PA [Terry Heiman-Patterson], Cold Spring Harbor Laboratory, Cold Spring Harbor, NY [Molly G. Hammell], Computer Science and Systems Biology Program, Ann Romney Center for Neurological Diseases, Department of Neurology and Division of Genetics in Department of Medicine, Brigham and Women's Hospital, Boston, MA, Harvard Medical School, Boston, MA, and Program in Medical and Population Genetics, Broad Institute, Cambridge, MA [Nikolaos. A. Patsopoulos], Ann Romney Center for Neurologic Diseases, Brigham and Women's Hospital, Harvard Medical School, Boston, MA [Oleg Butovsky], Department of Anesthesiology, Stony Brook University, Stony Brook, NY [Joshua Dubnau], Section of Infections of the Nervous System, National Institute of Neurological Disorders and Stroke, NIH, Bethesda, MD [Avindra Nath], Department of Neurology, Barrow Neurological Institute, St. Joseph's Hospital and Medical Center, Department of Neurobiology, Barrow Neurological Institute, St. Joseph's Hospital and Medical Center, Phoenix, AZ [Robert Bowser], Department of Neurology, Division of Neuromuscular Medicine, Columbia University, New York, NY [Matt Harms], Department of Neuropathology, Amsterdam UMC, University of Amsterdam, Amsterdam, The Netherlands [Eleonora Aronica], Department of Biology and Veterinary and Biomedical Sciences, The Pennsylvania State University, University Park, PA [Mary Poss], New York Stem Cell Foundation, Department of Bioengineering, School of Engineering and Applied Sciences, University of Pennsylvania, Philadelphia, PA [Jennifer Phillips-Cremins], Department of Pathology, Fishberg Department of Neuroscience, Friedman Brain Institute, Ronald M. Loeb Center for Alzheimer's Disease, Neuropathology Brain Bank & Research Core, Icahn School of Medicine at Mount Sinai, New York, NY [John P. Crary], Department of Neurology, Harvard Medical School, Neurological Clinical Research Institute, Massachusetts General Hospital, Boston, MA [Nazem Atassi], Department of Neurology, Hospital for Special Surgery and Weill Cornell Medical Center, New York, NY [Dale J. Lange], Medical Genetics, Atlantic Health System, Morristown Medical Center, Morristown, NJ, and Overlook Medical Center, Summit, NJ [Darius J. Adams], Center of Clinical Research, Experimental Surgery and Translational Research, Biomedical Research Foundation of the Academy of Athens (BRFAA), 4 Soranou Efesiou Street, 11527, Athens, Greece; 1st Department of Neurology, Eginition Hospital, Medical School, National and Kapodistrian University of Athens, Athens, Greece [Leonidas Stefanis], Neuromuscular/EMG service and ALS/Motor Neuron Disease Clinic, Hebrew University-Hadassah Medical Center, Jerusalem, Israel [Marc Gotkine], Board of Governors Regenerative Medicine Institute, Los Angeles, CA; Department of Neurology, Cedars-Sinai Medical Center, Los Angeles, CA [Robert H. Baloh], Neurological Clinical Research Institute, Massachusetts General Hospital, Boston, MA [Suma Babu], Departments of Neuroscience, and Genetics and Genomic Sciences, Ronald M. Loeb Center for Alzheimer's disease, Icahn School of Medicine at Mount Sinai, New York, NY [Towfique Raj], Harvard Medical School, Department of Physical Medicine & Rehabilitation, Spaulding Rehabilitation Hospital, Boston, MA [Sabrina Paganoni], Center for Cellular and Molecular Therapeutics, Children's Hospital of Philadelphia, Philadelphia, PA; Department of Genetics, Perelman School of Medicine, University of Pennsylvania, Philadelphia, PA [Ophir Shalem], Centre for Clinical Brain Sciences, University of Edinburgh, Edinburgh, UK; Euan MacDonald Centre for Motor Neurone Disease Research, University of Edinburgh, Edinburgh, UK [Colin Smith], Department of Genetics and Genomic Sciences, Icahn Institute of Data Science and Genomic Technology, Icahn School of Medicine at Mount Sinai, New York, NY [Bin Zhang], Department of Neuropathology, Georgetown Brain Bank, Georgetown Lombardi Comprehensive Cancer Center, Georgetown University Medical Center, Washington DC [Brent Harris], Neuroradiology Section, Department of Radiology and Biomedical Imaging, University of California, San Francisco, San Francisco, CA [Iris Broce], Neuromuscular Diseases Unit, Department of Neurology, Tel Aviv Sourasky Medical Center, Sackler Faculty of Medicine, Tel-Aviv University, Tel-Aviv, Israel [Vivian Drory], Department of Neuroscience, University of California San Diego, La Jolla, CA [John Ravits], Department of Neurology, University of Pennsylvania Perelman School of Medicine, Philadelphia, PA [Corey McMillan], Department of Neurology, Columbia University Perelman Medical Center, New York, NY [Vilas Menon], Department of Pharmaceutical Chemistry, University of California San Francisco, San Francisco, CA

[Lani Wu], Department of Pharmaceutical Chemistry, University of California San Francisco, San Francisco, CA [Steven Altschuler].

The affiliations for the members of the PROSPECT Consortium are: The Royal Bournemouth Hospital, Department of Medicine and Geriatrics, Bournemouth, UK [Khaled Amar], The James Cook University Hospital, Marton Road, Middlesbrough, South Tees Hospitals NHS Trust [Neil Archibald], Sheffield Institute for Translational Neuroscience (SITraN), University of Sheffield, Sheffield, UK [Oliver Bandmann], Care of the Elderly Department, Shrewsbury and Telford Hospital NHS Trust, Shrewsbury, UK [Erica Capps], Department of Neurology, Royal Gwent Hospital, Newport, UK [Alistair Church], Ashford and St Peters NHS Foundation Trust, Chertsey, UK [Jan Coebergh], Department of Clinical and Movement Neurosciences, UCL Queen Square Institute of Neurology, London, UK and Movement Disorders Centre, UCL Queen Square Institute of Neurology, London, UK [Alyssa Costantini, Edwin Jabbari, Huw R Morris], University Hospitals Leicester NHS Trust, Department of Neurology [Peter Critchley], Wessex Neurological Centre, University Hospitals Southampton NHS Foundation Trust, Southampton, UK [Boyd CP Ghosh], Department of Clinical Neurosciences, University of Oxford, UK [Michele T.M. Hu], Department of Neurology, Salford Royal NHS Foundation Trust, Manchester Academic Health Science Centre, University of Manchester, Manchester, UK [Christopher Kobylecki], Trafford Centre for Medical Research, Brighton and Sussex Medical School, BN1 9RY Brighton, UK [P. Nigel Leigh], University Hospital of the North Midlands [Carl Mann], Department of Neurology, Poole Hospital NHS Foundation Trust, Poole, UK [Luke A Massey], Department of Neurology Sunderland Royal Hospital, Sunderland, UK [Uma Nath], Clinical Ageing Research Unit., Newcastle University, Newcastle, UK [Nicola Pavese], Department of Neuroscience, Brighton and Sussex Medical School, Brighton, UK [Dominic Paviour], Department of Clinical Neurosciences and MRC Cognition and Brain Science Unit, University of Cambridge, Cambridge, UK [James B. Rowe], United Lincolnshire Hospitals NHS Trust [Jagdish Sharma], London North West University Healthcare NHS Trust [Jenny Vaughan].
